# Supplementary figures and images for: Anti-Fatigue Effects of Lycium barbarum Polysaccharide and Effervescent Tablets by Regulating Oxidative Stress and Energy Metabolism in Rats
Source: MDPI journal article supplement (doi:10.3390/ijms231810920), 2022-09-18

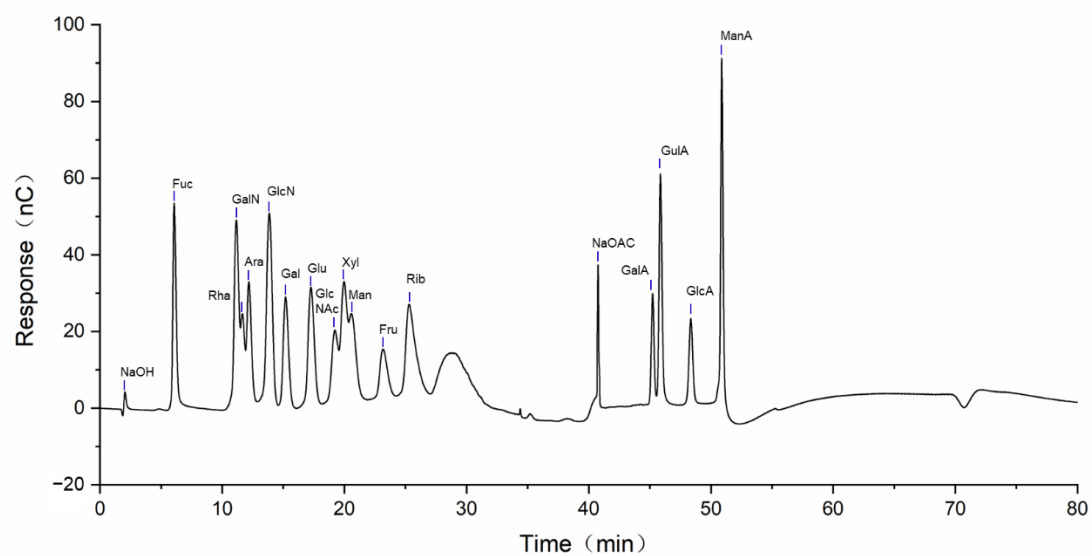

**Figure S1.** Ion chromatogram of 16 monosaccharide standards

Supplement: s1 [file s1]
